# Supplementary material
Source: publisher figshare collection journal article supplement (https://acs.figshare.com/ndownloader/files/25455667)
Supplement: Supplementary file 1 [file 25455667]

*Supporting information for*

## From batch to continuous sustainable production of 3-methyl-3-penten-2-one for synthetic ketone fragrances

*Xiaoda Wang,<sup>1</sup> Peng Hong,<sup>1</sup> Anton A. Kiss,<sup>2</sup> Qinglian Wang,<sup>1</sup> Ling Li,<sup>1\*</sup>*

*Hongxing Wang,<sup>3</sup> Ting Qiu<sup>1\*</sup>*

<sup>1</sup> Engineering Research Center of Reactive Distillation, Fujian Province University, College of Chemical Engineering, Fuzhou University, Wulongjiang Road, Fuzhou, 350108, Fujian, China.

<sup>2</sup> Department of Chemical Engineering and Analytical Science, The University of Manchester, Sackville Street, Manchester, M13 9PL, United Kingdom.

<sup>3</sup> College of Chemical Engineering and Materials Science, Tianjin University of Science & Technology, Thirteenth Street, Economic and Technological Development Zone, Tianjin 300457, Tianjin, China.

Corresponding authors: Prof. Ting Qiu, email: [tingqiu@fzu.edu.cn](mailto:tingqiu@fzu.edu.cn);

Prof. Ling Li, email: [liling@fzu.edu.cn](mailto:liling@fzu.edu.cn)

Pages: 4; Figures: 0; Tables: 0.

## **Details about TAC calculation**

TAC includes TCC and TOC. The TCC estimation follows the procedure of Douglas [1]. To calculate TCC, the equipment size should be known.

### **1. Equipment size**

#### **1.1 Condenser heat-transfer area ( $A_C$ )**

$$A_C = \frac{Q_C}{U_C \times \Delta T_C}$$

$Q_C$  (kW) is the condenser heat duty. The overall heat-transfer coefficient  $U_C$  is set as 0.852 kW/K·m<sup>2</sup>.  $\Delta T_C$  (K) is the temperature difference in the condenser. The inlet and outlet temperatures of cooling water are set as 298 K and 308 K, respectively.

#### **1.2 Reboiler heat-transfer area ( $A_R$ )**

$$A_R = \frac{Q_R}{U_R \times \Delta T_R}$$

$Q_R$  (kW) is the reboiler heat duty. The overall heat-transfer coefficient  $U_R$  is set as 0.568 kW/K·m<sup>2</sup>.  $\Delta T_R$  (K) is the temperature difference in the reboiler, which is heated by water vapor.

#### **1.3 Column diameter ( $D$ )**

In this work, the column diameter is calculated by using the tray sizing tool in Aspen Plus.

#### **1.4 Column length ( $L$ )**

$$L = 0.609N_T + 3$$

Total number of stage  $N_T$  is necessary for the calculation of  $L$  (m). 0.609 m is the tray spacing, and 3 is the height for distributor et al.

## 2. Equipment TCC (\$)

All equipment materials are carbon steel. The TCC of each piece of equipment is calculated as follows.

### 2.1 Column shell cost

$$\text{Shell cost} = \left( \frac{M \& S}{280} \right) \times (101.9 \times D^{1.066} \times L^{0.802}) \times (2.18 + F_C) = 15642.5 \times D^{1.066} \times L^{0.802}$$

Marshall & Swift index ( $M\&S$ ) of 1468.8 in 2019 is used in the calculation.  $F_C = F_M F_P$ , where  $F_M$  and  $F_P$  are the equipment material and pressure coefficients, respectively. Since the carbon steel is chosen as equipment material,  $F_M = 1$ . All the columns is operated at atmosphere pressure, so  $F_P = 1$ .

### 2.2 Column tray cost

$$\text{Tray cost} = \left( \frac{M \& S}{280} \right) \times (4.7 \times D^{1.55} \times L \times F_C) = 510.2 \times D^{1.55} \times L$$

$F_C = F_S + F_T + F_M$ , where  $F_S = 1$ ,  $F_T = 0$ , and  $F_M = 0$  are the tray spacing, tray type and equipment material coefficients, respectively.

### 2.3 Heat exchanger cost

$$\text{HX cost} = \left( \frac{M \& S}{280} \right) \times (101.3 (A_R^{0.65} + A_C^{0.65})) \times (2.29 + F_C) = 9064.1 \times (A_R^{0.65} + A_C^{0.65})$$

$F_C = (F_D + F_P) F_M$ , where reboiler type coefficient  $F_D$  is 1.35 when the Kettle reboiler is used.  $F_M = 1$ , and  $F_P = 0$ .

### 2.4 Reactor or tank cost

$$\text{Reactor cost} = \left( \frac{M \& S}{280} \right) \times (101.9 \times D^{1.066} \times L^{0.802}) \times (2.18 + F_C) = 15642.5 \times D^{1.066} \times L^{0.802}$$

$$F_C = F_M F_P$$

### 3. TOC (\$/year)

TOC consists of steam cost, cooling water cost and electricity cost:

$$TOC = (Q_R \cdot C_S + Q_C \cdot C_{CW} + Q_E \cdot C_E) \times 8000$$

$Q_R$  and  $Q_C$  represent the reboiler and condenser heat duties with the unit of GJ/h, respectively. The electricity consumption for the stirrer of BSTR is calculated by:

$$Q_E = \frac{N_p \rho N_i^3 D^5}{277.78}$$

where,  $N_p = 0.35$ ,  $\rho$  (kg/m<sup>3</sup>) is liquid density,  $N_i$  (s<sup>-1</sup>) is the stirring speed, and coefficient 277.78 is to change the unit from kw to GJ/h. 8000 (h/year) is the annual working hour. The prices of heating stream, cooling water, and electricity  $C_S$ ,  $C_C$ , and  $C_E$  are listed as follows:

Low pressure stream (433 K): \$7.78 per GJ;

Middle pressure stream (457 K): \$8.22 per GJ;

High pressure stream (527 K): \$9.88 per GJ;

Cool water (298.15 K): \$0.354 per GJ;

Electricity: \$ 16.8 per GJ;

### REFERENCE

- [1] Douglas, JM. Conceptual Design of Chemical Process, New York: McGraw-Hill; 1988.
